# Supplementary material
Source: PubMed Central journal article supplement (PMC5932240)
Supplement: NIHMS952437-supplement-2.pdf [file NIHMS952437-supplement-2.pdf]

**HLA-A\*02/NY-ESO-1(157-165) tetramer**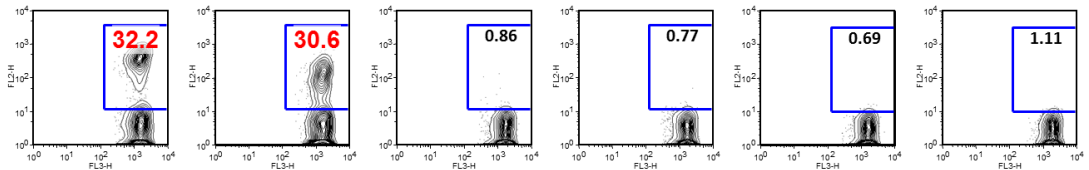**HLA-B\*35/NY-ESO-1(94-102) tetramer**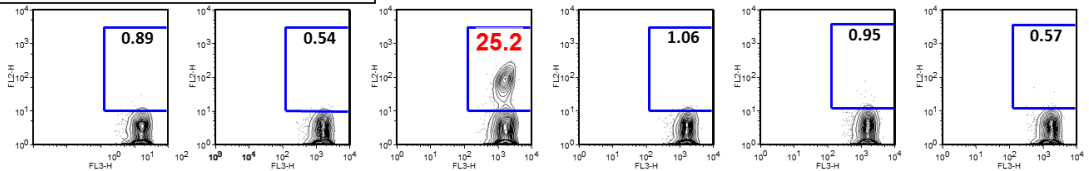**HLA-B\*35/NY-ESO-1(94-104) tetramer**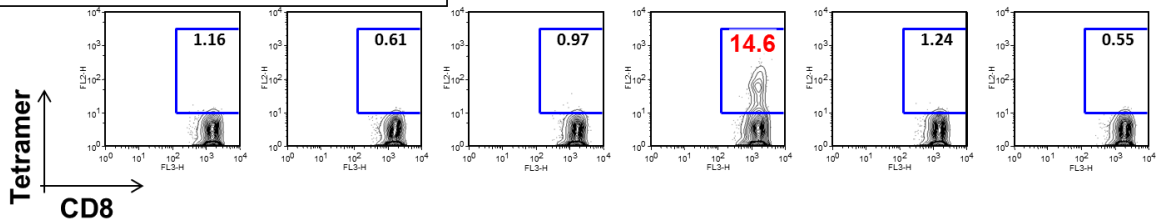

|          |         |         |        |        |        |      |
|----------|---------|---------|--------|--------|--------|------|
| TCR:     | AL      | JD      | KQ     | PP     | Jurkat | None |
| HLA:     | A*02    | A*02    | B*35   | B*35   | N/A    | N/A  |
| Peptide: | 157-165 | 157-165 | 94-102 | 94-104 | N/A    | N/A  |

**Supplementary Figure S2**

Tetramer staining of MHC class I-restricted NY-ESO-1-specific TCR-expressing T cells. NY-ESO-1-specific TCR-expressing retroviral vectors were constructed from 4 NY-ESO-1-specific CD8<sup>+</sup> T-cell clones: AL, JD, KQ, and PP. As a control TCR gene, a TCR-expressing vector was constructed from Jurkat. Polyclonally activated T cells from healthy donor PBMC were transduced by retroviral vectors and stained with the indicated tetramer. Staining of cells gated on CD8 is shown.
