# Supplementary material
Source: PubMed Central journal article supplement (PMC5932240)
Supplement: NIHMS952437-supplement-3.pdf [file NIHMS952437-supplement-3.pdf]

**Target: HLA-DP4+DR4+ Colo316 (NY-ESO-1/CIITA-transduced)**

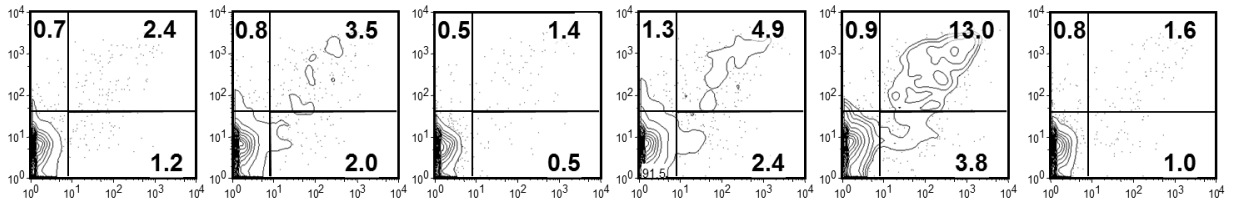

**Target: HLA-DR1+DP4+ SK-MEL-37 (NY-ESO-1 protein pulsed)**

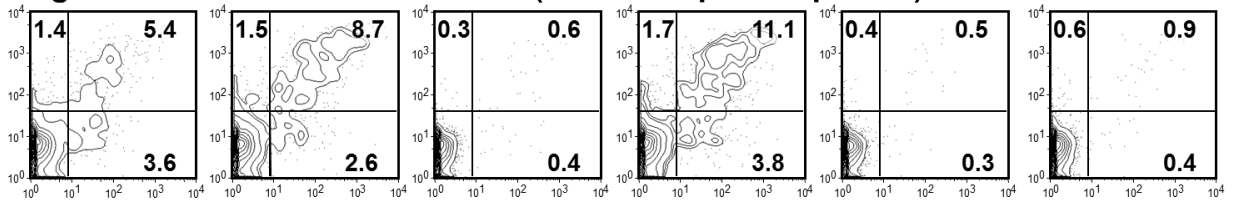

**DR1-restricted SB    DP4-restricted JM    DP4-restricted 3B5    DP4-restricted 5B8    DR4-restricted PB-T    None**

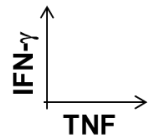

**Supplementary Figure S3**

Recognition of naturally processed NY-ESO-1 by MHC class II-restricted NY-ESO-1-specific TCR-expressing T cells. NY-ESO-1-specific TCR-expressing retroviral vectors were constructed from 5 NY-ESO-1-specific CD4<sup>+</sup> T-cell clones: SB, JM, 3B5, 5B8, and PB-T. Polyclonally activated T cells from healthy donor PBMC were transduced by retroviral vectors and co-cultured for 6 hours with the indicated MHC class II-expressing cancer cell line that expressed NY-ESO-1 or were pulsed with NY-ESO-1 protein in the presence of monensin. Intracellular IFN-γ and TNF-α were stained following cell surface CD4 staining. Staining of cells gated on CD4 is shown.
