# Supplementary material
Source: PubMed Central journal article supplement (PMC5932240)
Supplement: NIHMS952437-supplement-5.pdf [file NIHMS952437-supplement-5.pdf]

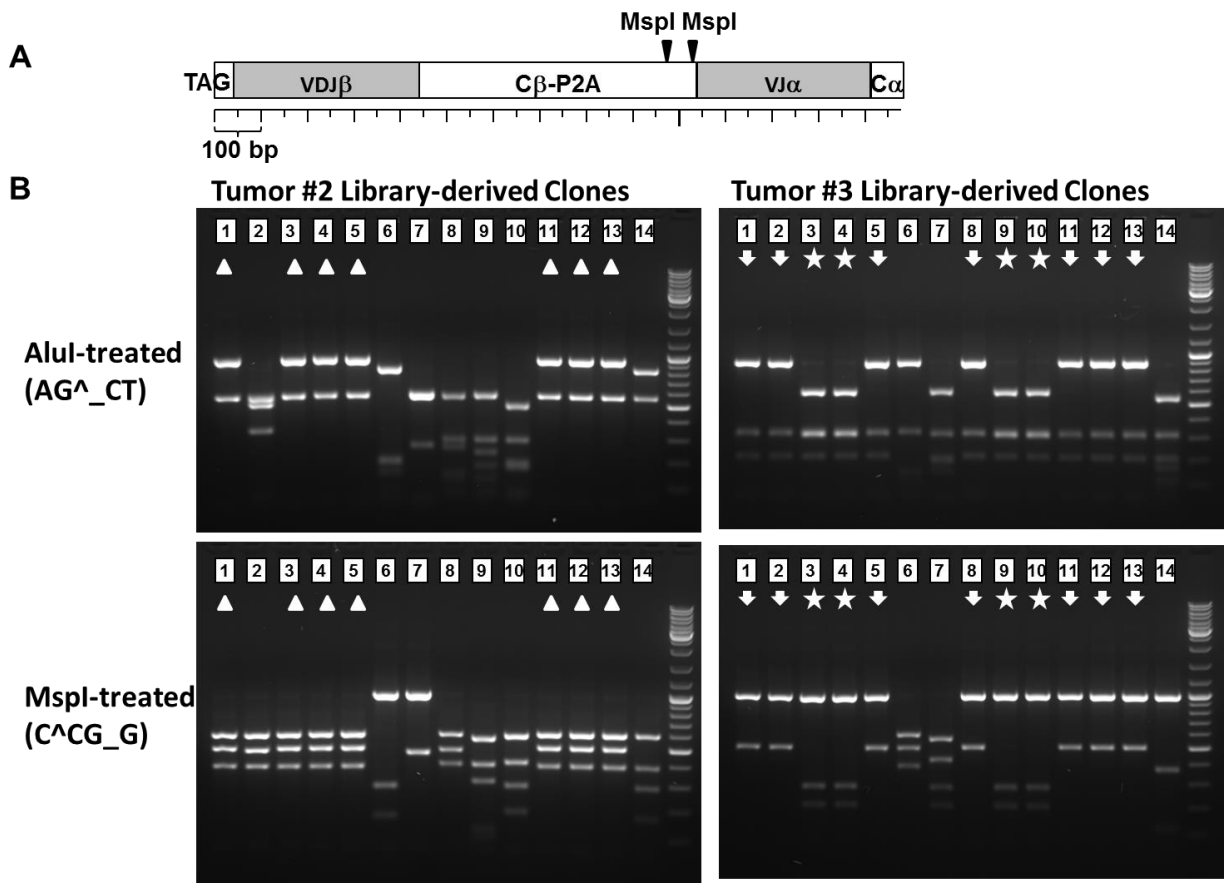

### Supplementary Figure S5

Characterization of individual clones in the tumor-derived TCR-expressing secondary library. The secondary library was constructed from isolated tetramer<sup>+</sup> T cells in T cells transduced by the primary library. *E. coli* competent cells were transformed by the secondary library plasmids. **A**, TCR inserts in the clones were PCR amplified by HTTCR#A and HTTCR#E primers by colony PCR. In the DNA fragment shown, gray regions are derived from the T cells, while open regions are common regions. These common regions contain no AluI-recognizing site and two MspI-recognizing sites. **B**, PCR amplicons in **A** was digested by the indicated restriction enzyme and agarose gel electrophoresed. Enriched clones were identified by the digestion patterns and identical clones were indicated by triangle, arrow and star symbols.
