# Supplementary material
Source: PubMed Central journal article supplement (PMC5932240)
Supplement: NIHMS952437-supplement-6.pdf [file NIHMS952437-supplement-6.pdf]

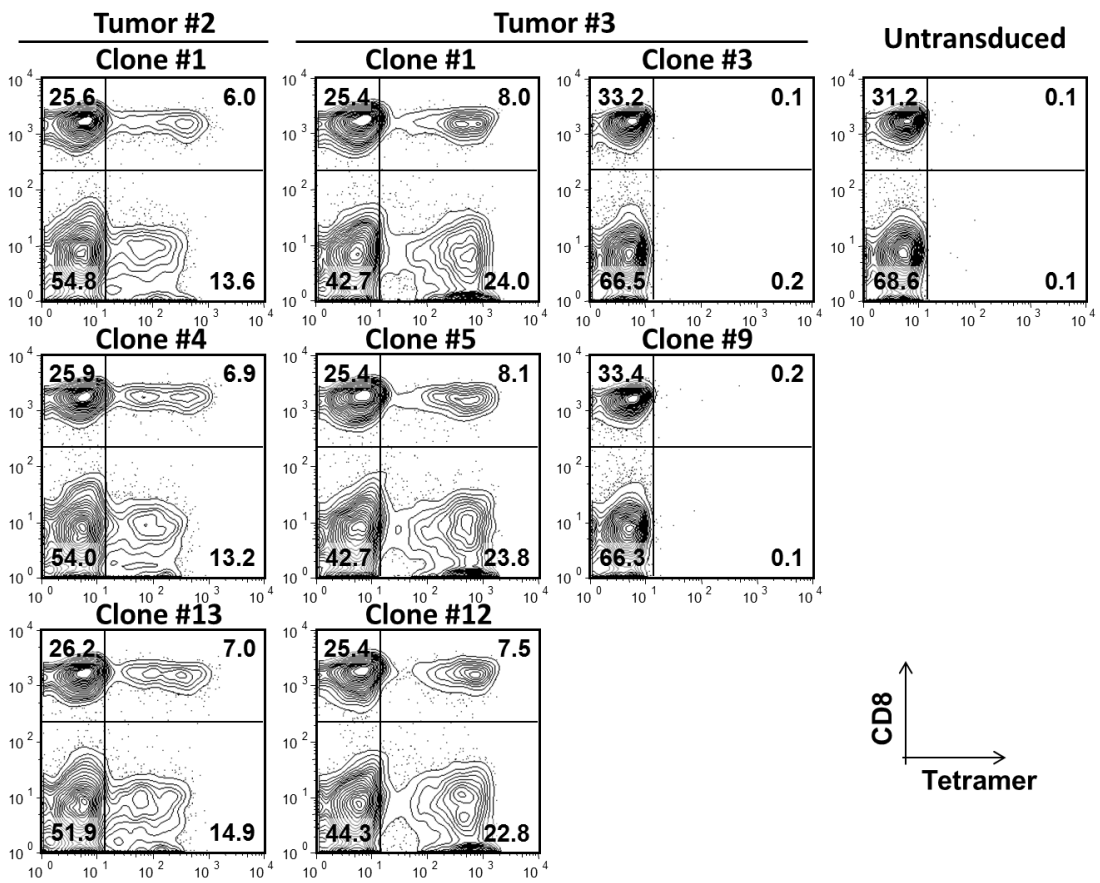

**Supplementary Figure S6**

Identification of NY-ESO-1-specific TCR clones in the secondary library. Plasmids were isolated from selected clones in Fig. S4. Polyclonally activated T cells from healthy donor PBMC were transduced by retroviral vectors and stained with the HLA-Cw\*03/NY-ESO-1(92-100) tetramer.
