# Supplementary material
Source: PubMed Central journal article supplement (PMC5932240)
Supplement: NIHMS952437-supplement-7.pdf [file NIHMS952437-supplement-7.pdf]

### A Tumor #2 Clone #4

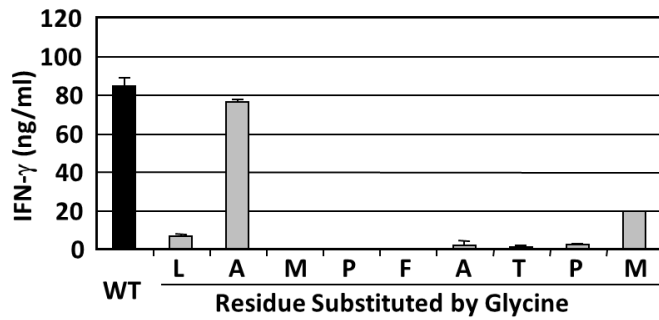

### B Tumor #3 Clone #5

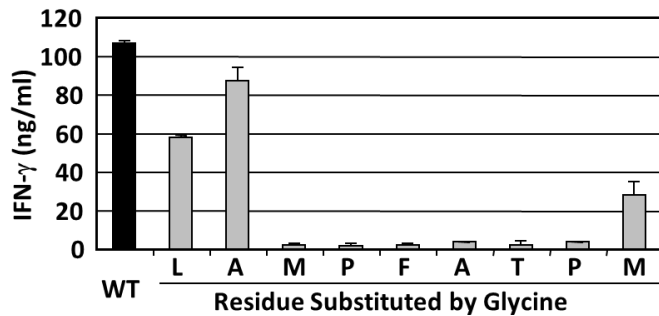

## Supplementary Figure S7

Recognition of Glycine-substituted peptides for HLA-Cw\*03-binding NY-ESO-1(92-100) epitope. HLA-Cw3+ NY-ESO-1-negative cells were pulsed with wild-type (WT) NY-ESO-1(92-100: LAMPFATPM), or one of its Glycine-substituted peptides at an indicated amino acid position for 1 hour and were co-cultured with the indicated TCR gene-transduced T cells (**A**, tumor #2-derived clone #4 and **B**, tumor #3-derived clone #5 in Figures S5 and S6) for 20 hours. IFN- $\gamma$  levels in the supernatant were determined by ELISA. Each bar shows mean IFN- $\gamma$  level and the standard deviation.
