# Supplementary material
Source: PubMed Central journal article supplement (PMC5932240)
Supplement: NIHMS952437-supplement-8.pdf [file NIHMS952437-supplement-8.pdf]

## Supplementary Table S1 Sequences of primers used in the TCR gene amplification

| Name       | Description                                   | Length | Sequence                                    |
|------------|-----------------------------------------------|--------|---------------------------------------------|
| HT-TCR#A   | $\beta$ chain-anchor-specific forward         | 43     | ACTTAAGCTTGGTACCGAGCTCGGATCTGCGGCCGCCACCATG |
| HT-TCR#B   | C $\beta$ -specific Reverse                   | 30     | CTCAAACACAGCGACCTCGGGTGGGAACAC              |
| HTTCR#C-1  | TRBV2*1,2-specific-forward                    | 34     | CGGCCGCCACCATGGATACCTGGCTCGTATGCTG          |
| HTTCR#C-2  | TRBV2*3-specific-forward                      | 34     | CGGCCGCCACCATGGATACCTGGCTGTATGCTGG          |
| HTTCR#C-3  | TRBV3-1*1-specific-forward                    | 28     | CGGCCGCCACCATGGGCTGCAGGCTCCT                |
| HTTCR#C-4  | TRBV3-1*2/9*1,2,3-specific-forward            | 30     | CGGCCGCCACCATGGGCTTCAGGCTCCTCT              |
| HTTCR#C-5  | TRBV4-1,2,3-specific-forward                  | 27     | CGGCCGCCACCATGGGCTGCAGGCTGC                 |
| HTTCR#C-6  | TRBV5-1*1-specific-forward                    | 28     | CGGCCGCCACCATGGGCTCCAGGCTGT                 |
| HTTCR#C-7  | TRBV5-4,5-specific-forward-specific-forward   | 26     | CGGCCGCCACCATGGGCCCTGGGCTC                  |
| HTTCR#C-8  | TRBV5-6*1-specific-forward-specific-forward   | 24     | CGGCCGCCACCATGGGCCCCGGGC                    |
| HTTCR#C-9  | TRBV5-8*1,2-specific-forward-specific-forward | 28     | CGGCCGCCACCATGGGACCCAGGCTCCT                |
| HTTCR#C-10 | TRBV6-1*1/6-9*1-specific-forward              | 30     | CGGCCGCCACCATGAGCATCGGGCTCCTGT              |
| HTTCR#C-11 | TRBV6-2*1/6-3*1/6-8*1-specific-forward        | 28     | CGGCCGCCACCATGAGCCTCGGGCTCCT                |
| HTTCR#C-12 | TRBV6-4*1-specific-forward                    | 34     | CGGCCGCCACCATGAGAATCAGGCTCCTGTGCTG          |
| HTTCR#C-13 | TRBV6-4*2-specific-forward                    | 32     | CGGCCGCCACCATGAGCATCAGGCTCCTGTGC            |
| HTTCR#C-14 | TRBV6-5*1-specific-forward                    | 30     | CGGCCGCCACCATGAGCATCGGCCTCCTGT              |
| HTTCR#C-15 | TRBV6-6*1,2,3,4,5-specific-forward            | 32     | CGGCCGCCACCATGAGCATCAGCCTCCTGTGC            |
| HTTCR#C-16 | TRBV7-2,3,4/7-8*1,2-specific-forward          | 28     | CGGCCGCCACCATGGGCACCAGGCTCCT                |
| HTTCR#C-17 | TRBV7-6*1/11-2*1,2,3-specific-forward         | 32     | CGGCCGCCACCATGGGCACCAGTGTCTCTATGT           |
| HTTCR#C-18 | TRBV7-6*2-specific-forward                    | 32     | CGGCCGCCACCATGGGCACCAGTCTCTCTATGC           |
| HTTCR#C-19 | TRBV7-7*1-specific-forward                    | 35     | CGGCCGCCACCATGGGTACCAGTCTCTATGCTGG          |
| HTTCR#C-20 | TRBV7-9*1,2,3,7-specific-forward              | 28     | CGGCCGCCACCATGGGCACCAGCCTCCT                |
| HTTCR#C-21 | TRBV7-9*4-specific-forward                    | 28     | CGGCCGCCACCATGGGGACCAGCCTCCT                |
| HTTCR#C-22 | TRBV7-9*6-specific-forward                    | 30     | CGGCCGCCACCATGGCCCTGTGTCTCTCTGG             |
| HTTCR#C-23 | TRBV10-1*1,2-specific-forward                 | 30     | CGGCCGCCACCATGGGCACGAGGCTCTTCT              |
| HTTCR#C-24 | TRBV10-2*1/7-2*2-specific-forward             | 30     | CGGCCGCCACCATGGGCACCAGGCTCTTCT              |
| HTTCR#C-25 | TRBV10-2*2-specific-forward                   | 32     | CGGCCGCCACCATGTGGCCCTTTGTCTGCTGT            |
| HTTCR#C-26 | TRBV10-3*1,2,3,4-specific-forward             | 37     | CGGCCGCCACCATGGGCACAAGGTTGTTCTTCTATGT       |
| HTTCR#C-27 | TRBV11-1*1-specific-forward                   | 32     | CGGCCGCCACCATGAGCACCAGGCTTCTCTGC            |
| HTTCR#C-28 | TRBV11-3*1,2,3-specific-forward               | 31     | CGGCCGCCACCATGGGTACCAGGCTCCTCTG             |
| HTTCR#C-29 | TRBV12-3*1-specific-forward                   | 32     | CGGCCGCCACCATGGACTCCTGGACCTTCTGC            |
| HTTCR#C-30 | TRBV12-4*1-specific-forward                   | 31     | CGGCCGCCACCATGGACTCCTGGACCCTCTG             |
| HTTCR#C-31 | TRBV12-4*2-specific-forward                   | 29     | CGGCCGCCACCATGGGCTCCTGGACCCTC               |
| HTTCR#C-32 | TRBV12-5*1-specific-forward                   | 28     | CGGCCGCCACCATGGCCACCAGGCTCCT                |

|            |                                         |    |                                                 |
|------------|-----------------------------------------|----|-------------------------------------------------|
| HTTCR#C-33 | TRBV13*1,2-specific-forward             | 33 | CGGCCGCCACCATGCTTAGTCCTGACCTGCCTG               |
| HTTCR#C-34 | TRBV14*1,2-specific-forward             | 38 | CGGCCGCCACCATGGTTTCCAGGCTTCTCAGTTTAGTG          |
| HTTCR#C-35 | TRBV15*1,2,3-specific-forward           | 30 | CGGCCGCCACCATGGGTCCTGGGCTTCTCC                  |
| HTTCR#C-36 | TRBV16*1,3-specific-forward             | 36 | CGGCCGCCACCATGAGCCCAATATTCACCTGCATCA            |
| HTTCR#C-37 | TRBV18*1-specific-forward               | 34 | CGGCCGCCACCATGGACACCAGAGTACTCTGCTG              |
| HTTCR#C-38 | TRBV19*1,2,3-specific-forward           | 31 | CGGCCGCCACCATGAGCAACCAGGTGCTCTG                 |
| HTTCR#C-39 | TRBV20-1*1,2,3,4,5,6,7-specific-forward | 30 | CGGCCGCCACCATGCTGCTGCTTCTGCTGC                  |
| HTTCR#C-40 | TRBV24-1*1-specific-forward             | 30 | CGGCCGCCACCATGGCCTCCCTGCTCTTCT                  |
| HTTCR#C-41 | TRBV25-1*1-specific-forward             | 36 | CGGCCGCCACCATGACTATCAGGCTCCTCTGCTACA            |
| HTTCR#C-42 | TRBV27*1-specific-forward               | 26 | CGGCCGCCACCATGGGCCCCAGCTC                       |
| HTTCR#C-43 | TRBV28*1-specific-forward               | 33 | CGGCCGCCACCATGGGAATCAGGCTCCTCTGTC               |
| HTTCR#C-44 | TRBV29-1*1,2,3-specific-forward         | 35 | CGGCCGCCACCATGCTGAGTCTTCTGCTCCTTCTC             |
| HTTCR#C-45 | TRBV30*1,2,5-specific-forward           | 34 | CGGCCGCCACCATGATGCTCTGCTCTCTCCTTGC              |
| HT-TCR#D   | $\alpha$ chain anchor-specific forward  | 29 | GGAGACGTGGAAGAAAACCCCGGTCCCATG                  |
| HT-TCR#E   | C $\alpha$ -specific reverse            | 30 | AGGCAGACAGACTTGTCACTGGATTTAGAG                  |
| HTTCR#F-1  | TRAV1-1*1,2-specific forward            | 37 | AACCCCGGTCCCATGTGGGGAGCTTTCCTTCTCTATG           |
| HTTCR#F-2  | TRAV1-2*1-specific forward              | 42 | AACCCCGGTCCCATGTGGGGAGTTTTCTTCTTTATGTTTCC       |
| HTTCR#F-3  | TRAV2*1-specific forward                | 33 | AACCCCGGTCCCATGGCTTTGCAGAGCACTCTG               |
| HTTCR#F-4  | TRAV3*1-specific forward                | 31 | AACCCCGGTCCCATGGCCTCTGCACCCATCT                 |
| HTTCR#F-5  | TRAV4*1-specific forward                | 32 | AACCCCGGTCCCATGAGGCAAGTGGCGAGAGT                |
| HTTCR#F-6  | TRAV5*1-specific forward                | 41 | AACCCCGGTCCCATGAAGACATTTGCTGGATTTTCGTTTCT       |
| HTTCR#F-7  | TRAV6*1,3,4-specific forward            | 34 | AACCCCGGTCCCATGGAGTCATTCCTGGGAGGTG              |
| HTTCR#F-8  | TRAV6*2,5,6-specific forward            | 32 | AACCCCGGTCCCATGGAGTCATCCCTGGGAGG                |
| HTTCR#F-9  | TRAV7*1-specific forward                | 34 | AACCCCGGTCCCATGGAGAAGATGCGGAGACCTG              |
| HTTCR#F-10 | TRAV8-1*1,2-specific forward            | 35 | AACCCCGGTCCCATGCTCCTGTTGCTCATAACCAGT            |
| HTTCR#F-11 | TRAV8-2,4,6-specific forward            | 31 | AACCCCGGTCCCATGCTCCTGCTGCTCGTCC                 |
| HTTCR#F-12 | TRAV8-3*1,2,3-specific forward          | 34 | AACCCCGGTCCCATGCTCCTGGAGCTTATCCAC               |
| HTTCR#F-13 | TRAV9-1*1-specific forward              | 39 | AACCCCGGTCCCATGAATTCTTCTTAGGACCAGCGATT          |
| HTTCR#F-14 | TRAV9-2*1,2,3,4-specific forward        | 47 | AACCCCGGTCCCATGAATCTTCTCCAGGCTTAGTATCTCTGATACT  |
| HTTCR#F-15 | TRAV10*1-specific forward               | 40 | AACCCCGGTCCCATGAAAAAGCATCTGACGACCTTCTGG         |
| HTTCR#F-16 | TRAV12-1*1,2-specific forward           | 46 | AACCCCGGTCCCATGATGATATCCTTGAGAGTTTTACTGGTGATCC  |
| HTTCR#F-17 | TRAV12-2-specific forward               | 47 | AACCCCGGTCCCATGATGAAATCCTTGAGAGTTTTACTAGTGATCCT |
| HTTCR#F-18 | TRAV12-3*1-specific forward             | 46 | AACCCCGGTCCCATGATGAAATCCTTGAGAGTTTTACTGGTGATCC  |
| HTTCR#F-19 | TRAV12-3*2-specific forward             | 46 | AACCCCGGTCCCATGATGAAATCCTTGAGAGTTTTACTGGTCATCC  |
| HTTCR#F-20 | TRAV13-1*1,2,3-specific forward         | 46 | AACCCCGGTCCCATGACATCCATTTCGAGCTGTATTTATATTCCTGT |
| HTTCR#F-21 | TRAV13-2*1,2-specific forward           | 45 | AACCCCGGTCCCATGATGGCAGGCATTTCGAGTTTTATTTATGTAC  |
| HTTCR#F-22 | TRAV14/DV4*1,2,3,4-specific forward     | 37 | AACCCCGGTCCCATGTCACTTTCTAGCCTGCTGAAGG           |
| HTTCR#F-23 | TRAV16*1-specific forward               | 34 | AACCCCGGTCCCATGAAGCCCACCTCATCTCAG               |

|            |                                     |    |                                                   |
|------------|-------------------------------------|----|---------------------------------------------------|
| HTTCR#F-24 | TRAV17*1-specific forward           | 35 | AACCCCGGTCCCATGGAAACTCTCCTGGGAGTGTC               |
| HTTCR#F-25 | TRAV18*1-specific forward           | 33 | AACCCCGGTCCCATGCTGTCTGCTTCCTGCTCA                 |
| HTTCR#F-26 | TRAV19*1-specific forward           | 33 | AACCCCGGTCCCATGAACATGCTGACTGCCAGC                 |
| HTTCR#F-27 | TRAV20*1,2,3,4-specific forward     | 40 | AACCCCGGTCCCATGGAGAAAATGTTGGAGTGTGCATTCA          |
| HTTCR#F-28 | TRAV21*1,2-specific forward         | 31 | AACCCCGGTCCCATGGAGACCCTCTTGGGCC                   |
| HTTCR#F-29 | TRAV22*1-specific forward           | 37 | AACCCCGGTCCCATGAAGAGGATATTGGGAGCTCTGC             |
| HTTCR#F-30 | TRAV23/DV6*1,2,3,4-specific forward | 47 | AACCCCGGTCCCATGGACAAGATCTTAGGAGCATCATTTTTAGTTCT   |
| HTTCR#F-31 | TRAV24*1,2-specific forward         | 36 | AACCCCGGTCCCATGGAGAAGAATCCTTTGGCAGCC              |
| HTTCR#F-32 | TRAV25*1-specific forward           | 44 | AACCCCGGTCCCATGCTACTCATCACATCAATGTTGGTCTTATG      |
| HTTCR#F-33 | TRAV26-1*1,2,3-specific forward     | 34 | AACCCCGGTCCCATGAGGCTGGTGGCAAGAGTAA                |
| HTTCR#F-34 | TRAV26-2*1-specific forward         | 40 | AACCCCGGTCCCATGAGTTGGTGACAAGCATTACTGTAC           |
| HTTCR#F-35 | TRAV26-2*02-specific forward        | 42 | AACCCCGGTCCCATGAAGTTGGTGACAAGCATTACTGTACTC        |
| HTTCR#F-36 | TRAV27*1,2,3-specific forward       | 36 | AACCCCGGTCCCATGGTCCTGAAATTCTCCGTGTCC              |
| HTTCR#F-37 | TRAV29/DV5*1-specific forward       | 29 | AACCCCGGTCCCATGGCCATGCTCCTGGG                     |
| HTTCR#F-38 | TRAV30*1,3,4-specific forward       | 38 | AACCCCGGTCCCATGGAGACTCTCCTGAAAGTGCTTTC            |
| HTTCR#F-39 | TRAV30*2-specific forward           | 35 | AACCCCGGTCCCATGGAGACTCTCCTGAAAGTGCC               |
| HTTCR#F-40 | TRAV34*1-specific forward           | 37 | AACCCCGGTCCCATGGAGACTGTTCTGCAAGTACTCC             |
| HTTCR#F-41 | TRAV35*1,2-specific forward         | 49 | AACCCCGGTCCCATGCTCCTTGAACATTTATTAATAATCTTGTGGATGC |
| HTTCR#F-42 | TRAV36/DV7*1-specific forward       | 33 | AACCCCGGTCCCATGATGAAGTGCCGAGGCT                   |
| HTTCR#F-43 | TRAV36/DV7*2,3,4-specific forward   | 38 | AACCCCGGTCCCATGATGAAGTGCCACAGGCTTACT              |
| HTTCR#F-44 | TRAV38-1*1,2,3-specific forward     | 35 | AACCCCGGTCCCATGACACGAGTTAGCTTGCTGTG               |
| HTTCR#F-45 | TRAV38-1*4-specific forward         | 35 | AACCCCGGTCCCATGACACCAGTTAGCTTGCTGTG               |
| HTTCR#F-46 | TRAV38-2/DV8*1-specific forward     | 29 | AACCCCGGTCCCATGGCATGCCCTGGCTT                     |
| HTTCR#F-47 | TRAV39*1-specific forward           | 42 | AACCCCGGTCCCATGAAGAAGCTACTAGCAATGATTCTGTGG        |
| HTTCR#F-48 | TRAV40*1-specific forward           | 43 | AACCCCGGTCCCATGAACTCCTCTCTGGACTTTCTAATTCTGA       |
| HTTCR#F-49 | TRAV41*1-specific forward           | 39 | AACCCCGGTCCCATGGTGAAGATCCGGCAATTTTTGTTG           |
| HTTCR#G    | C $\beta$ -specific forward         | 30 | GTGTTCCACCCGAGGTCGCTGTGTTTGAG                     |
| HTTCR#H    | P2A-specific Reverse                | 30 | CATGGGACCGGGTTTTCTTCCACGTCTCC                     |

## Supplementary Table S2 Sequences of TCR clones shown in Supplemental Figure S5\*

| Tumor #2                     | V region subtype | CDR3 sequence (D region subtype) | J region subtype |
|------------------------------|------------------|----------------------------------|------------------|
| Clone #1 TCR $\beta$ chain   | TRBV6-5*01       | CASSYRTGSDEQFF (TRBD1*01)        | TRBJ2-1*01       |
| Clone #1 TCR $\alpha$ chain  | TRAV29/DV5*01    | CAARLLNRDDKIIF                   | TRAJ30*01        |
| Clone #4 TCR $\beta$ chain   | TRBV6-5*01       | CASSYRTGSDEQFF (TRBD1*01)        | TRBJ2-1*01       |
| Clone #4 TCR $\alpha$ chain  | TRAV29/DV5*01    | CAARLLNRDDKIIF                   | TRAJ30*01        |
| Clone #12 TCR $\beta$ chain  | TRBV6-5*01       | CASSYRTGSDEQFF (TRBD1*01)        | TRBJ2-1*01       |
| Clone #12 TCR $\alpha$ chain | TRAV29/DV5*01    | CAARLLNRDDKIIF                   | TRAJ30*01        |
| Tumor #3, Clonotype 3A       | V region subtype | CDR3 sequence (D region subtype) | J region subtype |
| Clone #1 TCR $\beta$ chain   | TRBV9*01         | CASSLGTSGIQFF (TRBD2*02)         | TRBJ2-1*01       |
| Clone #1 TCR $\alpha$ chain  | TRAV29/DV5*01    | CAASEMGTSYDKVIF                  | TRAJ50*01        |
| Clone #5 TCR $\beta$ chain   | TRBV9*01         | CASSLGTSGIQFF (TRBD2*02)         | TRBJ2-1*01       |
| Clone #5 TCR $\alpha$ chain  | TRAV29/DV5*01    | CAASEMGTSYDKVIF                  | TRAJ50*01        |
| Clone #12 TCR $\beta$ chain  | TRBV9*01         | CASSLGTSGIQFF (TRBD2*02)         | TRBJ2-1*01       |
| Clone #12 TCR $\alpha$ chain | TRAV29/DV5*01    | CAASEMGTSYDKVIF                  | TRAJ50*01        |
| Tumor #3, Clonotype 3B       | V region subtype | CDR3 sequence (D region subtype) | J region subtype |
| Clone #3 TCR $\beta$ chain   | TRBV9*01         | CASSLGTSGIQFF (TRBD2*02)         | TRBJ2-1*01       |
| Clone #3 TCR $\alpha$ chain  | TRAV2*01         | CAVYSGGGADGLTF                   | TRAJ45*01        |
| Clone #9 TCR $\beta$ chain   | TRBV9*01         | CASSLGTSGIQFF (TRBD2*02)         | TRBJ2-1*01       |
| Clone #9 TCR $\alpha$ chain  | TRAV2*01         | CAVYSGGGADGLTF                   | TRAJ45*01        |

\*TCR  $\alpha$  and  $\beta$  chain sequences were obtained by the Sanger sequencing and were analyzed using the IMGT/V-QUEST platform (<http://www.imgt.org/>).
